# Supplementary material for: Facile supramolecular strategy to construct solid fluorophore@metal–organic framework composites
Source: Royal Society of Chemistry journal article supplement (doi:10.1039/d2ma00548d), 2022-01-01
Supplement: d2ma00548d1.pdf [file d2ma00548d1.pdf]

*Supplementary Information for*

## **Facile Supramolecular Strategy to Construct Solid Fluorophore@Metal-Organic Framework Composites**

*Lavinia A. Trifoi, Gregory K. Hodgson, Nicholas P. Dogantzis, Sumaiya A. Soha, Roya M. Dayam, Costin N. Antonescu, Roberto J. Botelho, R. Stephen Wylie and Stefania Impellizzeri\**

Laboratory for Nanomaterials and Molecular Plasmonics, Department of Chemistry and Biology, Toronto Metropolitan University, 350 Victoria St., Toronto, ON, M5B 2K3, Canada.

### **Content**

|                                                                                                                                                 |            |
|-------------------------------------------------------------------------------------------------------------------------------------------------|------------|
| <b>Fig. S1</b> $^1\text{H}$ and $^{13}\text{C}$ NMR spectra of <b>FMe520</b>                                                                    | <b>S2</b>  |
| <b>Fig. S2</b> Calculation of the molar extinction coefficient of <b>FMe520</b>                                                                 | <b>S3</b>  |
| Synthesis of <b>FMe520@ZIF-8</b> and calculation of the encapsulation efficiency ( <b>Fig. S3</b> )                                             | <b>S4</b>  |
| Calculation of the adsorption efficiency of <b>FMe520</b> on pre-formed ZIF-8 ( <b>Fig. S4</b> )                                                | <b>S5</b>  |
| <b>Fig. S5</b> Emission spectra and photographs of <b>FMe520@ZIF-8</b> in $\text{CH}_3\text{OH}$ stirred for 7 days                             | <b>S6</b>  |
| <b>Fig. S6</b> Scanning Electron Microscopy (SEM) and size distribution of ZIF-8 particles                                                      | <b>S7</b>  |
| <b>Fig. S7</b> Scanning Electron Microscopy (SEM) and size distribution of <b>FMe520@ZIF-8</b> particles                                        | <b>S8</b>  |
| <b>Fig. S8</b> FTIR-ATR spectra of ZIF-8, <b>FMe520</b> and <b>FMe520@ZIF-8</b>                                                                 | <b>S9</b>  |
| <b>Fig. S9</b> Electrospray ionization mass spectrometry of <b>FMe520</b> , ZIF-8, and <b>FMe520@ZIF-8</b>                                      | <b>S10</b> |
| <b>Fig. S10</b> Absorption spectra of <b>FMe520@ZIF-8</b> before and after addition of HCl                                                      | <b>S11</b> |
| <b>Fig. S11</b> Absorption spectra of <b>FMe520</b> before and after addition of HCl                                                            | <b>S11</b> |
| <b>Fig. S12</b> Photographs of <b>FMe520@ZIF-8</b> , <b>FMe520</b> , and ZIF-8 powders under ultraviolet light                                  | <b>S12</b> |
| <b>Table S1</b> Average fluorescence lifetimes of <b>FMe520</b> and <b>FMe520@ZIF-8</b>                                                         | <b>S12</b> |
| <b>Fig. S13</b> Raw FLIM data for <b>FMe520</b>                                                                                                 | <b>S13</b> |
| <b>Fig. S14</b> Raw FLIM data for <b>FMe520@ZIF-8</b>                                                                                           | <b>S13</b> |
| <b>Fig. S15</b> Emission spectra of <b>FMe520@ZIF-8</b> and <b>FMe520</b> before and after irradiation at 455 nm                                | <b>S14</b> |
| <b>Table S2</b> Zn-N bond distances in ZIF-8                                                                                                    | <b>S15</b> |
| <b>Fig. S16</b> Four conformers of <b>FMe520</b>                                                                                                | <b>S15</b> |
| <b>Table S3</b> Boltzmann-averaged fractional abundances of <b>FMe520</b> conformers                                                            | <b>S16</b> |
| <b>Table S4</b> Energy differences (SCC-DFTB) between optimized <b>FMe520</b> conformer-cage complexes and the sums of the separated components | <b>S17</b> |
| <b>Fig. S17</b> Four examples of stabilized ZIF-8 cage complexes of <b>FMe520</b>                                                               | <b>S18</b> |

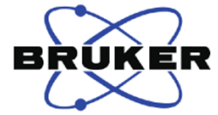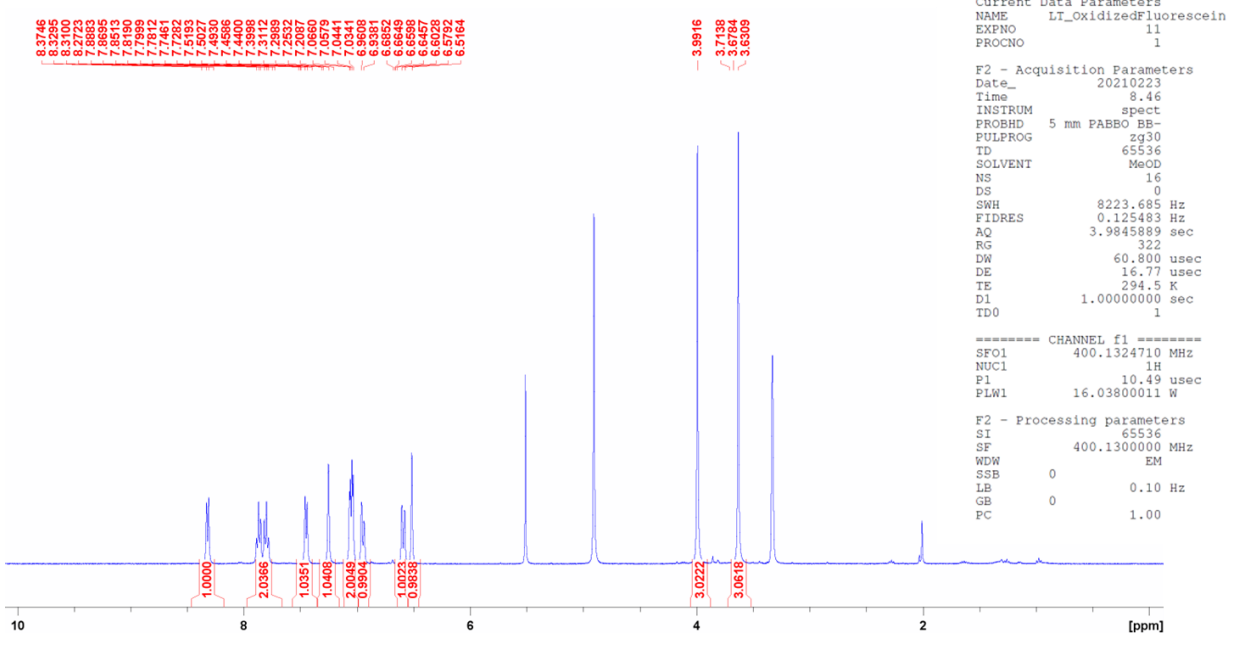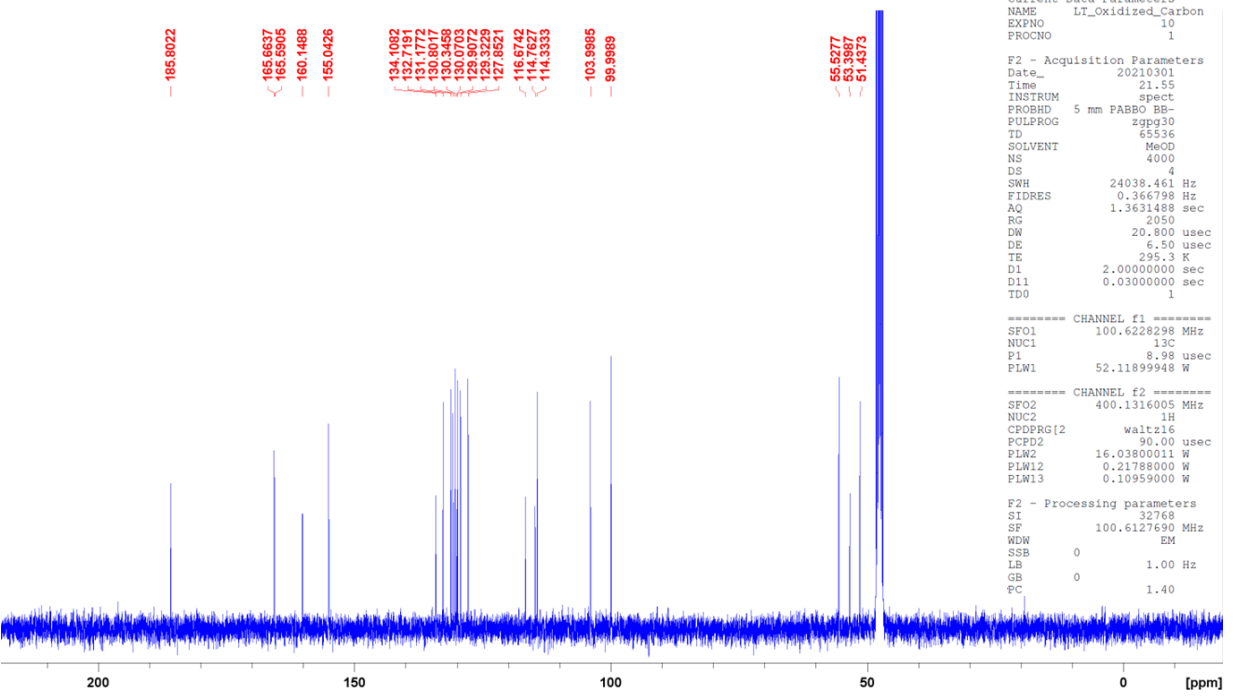

Figure S1. <sup>1</sup>H and <sup>13</sup>C NMR of FMe520 in CD<sub>3</sub>OD.

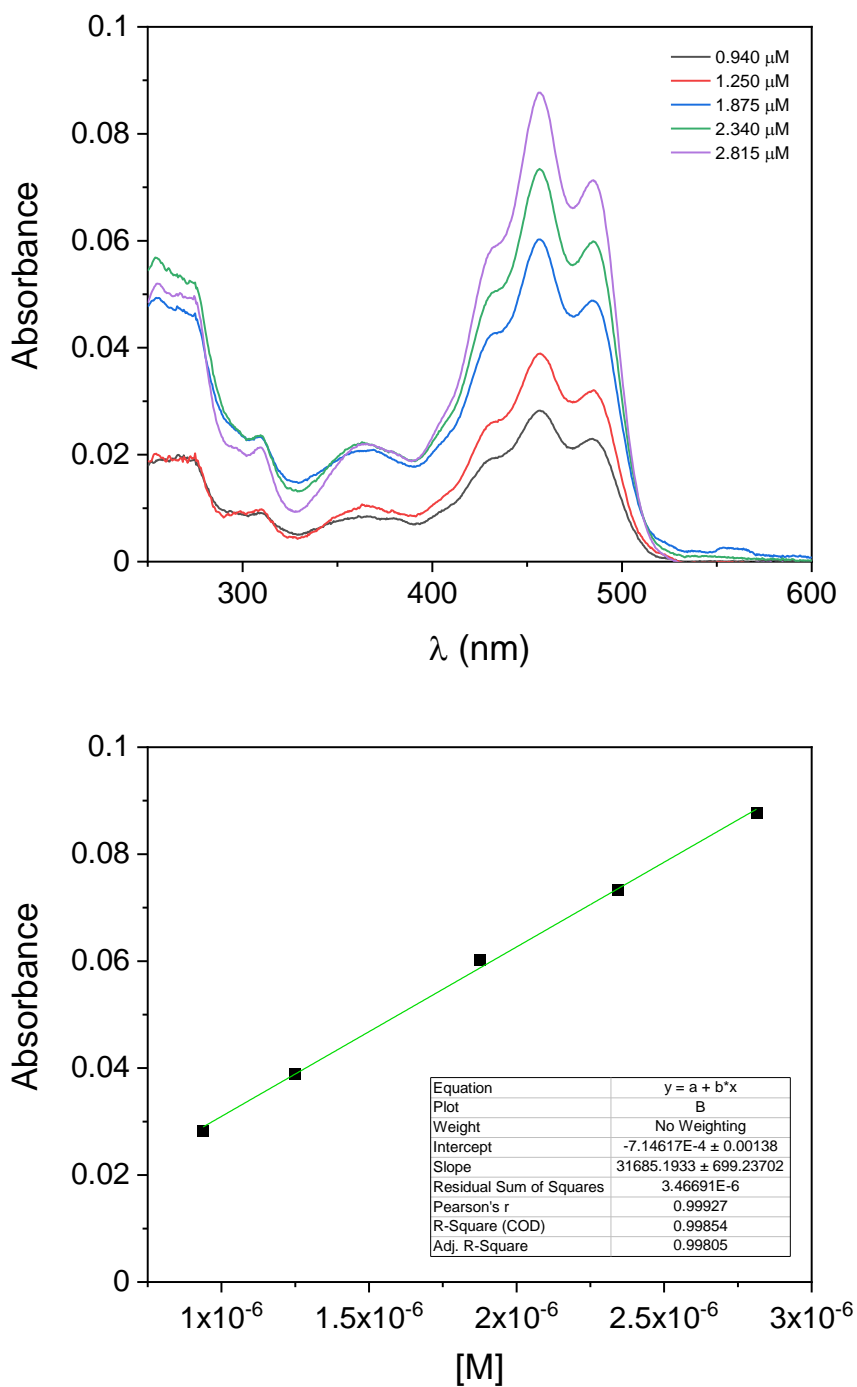

**Figure S2.** Absorption spectra of a CH<sub>3</sub>OH solution of **FMe520** (20°C) at variable concentrations and molar extinction coefficient calculation ( $\lambda_{\text{Abs}} = 455 \text{ nm}$ , the green line represents linear fitting).

## Synthesis of FMe520@ZIF-8 and Calculation of the Encapsulation Efficiency

20.7 mg (0.058 mmol) of **FMe520** were placed in a 100 mL round bottom flask. Using a graduated glass pipette, 25 mL of CH<sub>3</sub>OH were added to obtain a 2.3 mM stock solution. 12 μL of this solution were then used to prepare 10 mL of a 2.75 μM solution (mass of **FMe520** = 9.9 μg) for spectra analysis (*a* in Figure S3). In a round bottom flask, we then recombined the diluted solution with the stock to obtain a total volume of 35 mL. To this, 205 mg (2.5 mmol) of 2-methylimidazole were added and the solution was sonicated. In a separate vessel, 246 mg (1.3 mmol) of Zn(NO<sub>3</sub>)<sub>2</sub> were dissolved in 30 mL of CH<sub>3</sub>OH and added to the solution containing the dye and ligand. The mixture was undisturbed for 48 hours to obtain **FMe520@ZIF-8**, which was purified via centrifugation (4 × 9000 rpm, CH<sub>3</sub>OH) until no trace of residual dye was detected in the supernatants using absorption and emission spectroscopy. The mass of **FMe520@ZIF-8** obtained was 43.7 mg. The recovered supernatants were combined, dried under reduced pressure, and diluted as described above (25 mL CH<sub>3</sub>OH, of which 12 μL were diluted up to 10 mL for spectral analysis, *b* in Figure S3). Knowing that the molar extinction coefficient of **FMe520** in CH<sub>3</sub>OH is 31,685 M<sup>-1</sup> cm<sup>-1</sup> at 455 nm, we calculated the spectral concentration of non-encapsulated **FMe520** to be 1.58 μM, which can then be reconducted to 0.033 mmol of **FMe520** recovered, indicating that (0.058 – 0.033) = 0.025 mmol, or 9 mg of **FMe520** (43%), were successfully encapsulated within ZIF-8. A consistent result is achieved by extracting the concentration of encapsulated **FMe520** from Δ*A* at 455 nm in Figure S3 (where Δ*A* = *A*<sub>before</sub> – *A*<sub>after</sub> = *A*<sub>*a*</sub> – *A*<sub>*b*</sub>) and resulting in 0.024 mmol = 8.8 mg of **FMe520** (42.5%) effectively encapsulated.

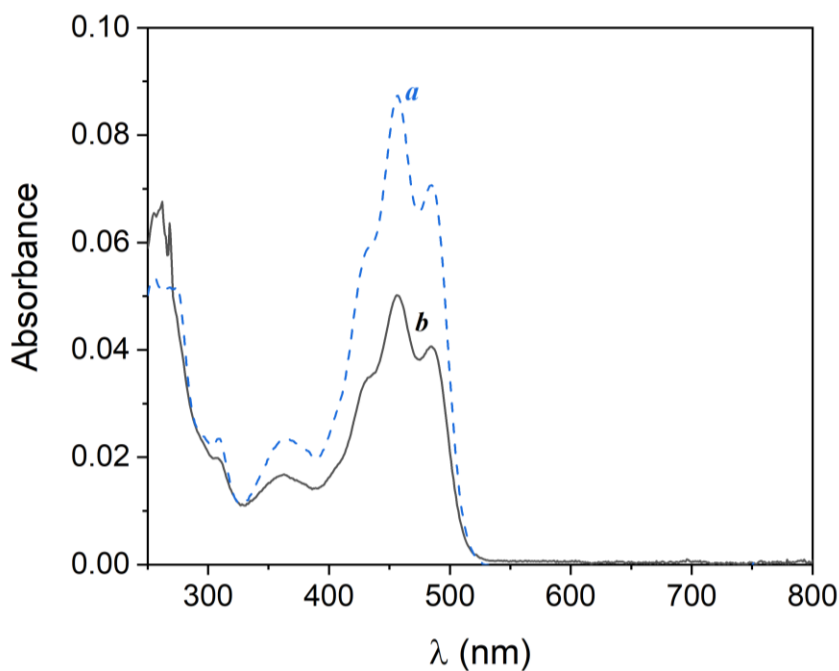

**Figure S3.** Absorption spectra (20°C, CH<sub>3</sub>OH) of the combined and rediluted supernatants obtained after encapsulation of **FMe520** into ZIF-8.

We repeated the same protocol independently by reducing the crystallization time from 48 to 24 h. Spectroscopic data indicate an encapsulation efficiency of **FMe520** in ZIF-8 of ~22% (average of the two calculation methods which yielded 21.5% and 22%, respectively).

### Calculation of the Adsorption Efficiency of FMe520 on Pre-Formed ZIF-8

9.3 mg (0.026 mmol) of **FMe520** were dissolved in 100 mL of CH<sub>3</sub>OH to obtain a 0.26 mM stock solution. 330  $\mu$ L of this solution were then added to 3 mL of CH<sub>3</sub>OH to obtain a 26  $\mu$ M solution for spectra analysis (*a* in Figure S4). We then recombined the diluted solution with the stock and evaporated all solvent to recover **FMe520** in powder form. Next, 20.4 mg of ZIF-8 were dissolved in 25.0 mL of CH<sub>3</sub>OH in a round bottom flask. **FMe520** (9.3 mg) was added to the dispersion of ZIF-8 and stirred for 48 hours. The mixture was then centrifuged ( $4 \times 9000$  rpm). The recovered supernatants were combined, dried under reduced pressure, and diluted as described above (100 mL CH<sub>3</sub>OH, of which 330  $\mu$ L were added to 3 mL for spectral analysis, *b* in Figure S4). Knowing that the molar extinction coefficient of **FMe520** in CH<sub>3</sub>OH is  $31,685 \text{ M}^{-1} \text{ cm}^{-1}$  at 455 nm, we calculated the spectral concentration of non-adsorbed **FMe520** to be 23.9  $\mu$ M, which can then be reconducted to 0.0239 mmol (8.62 mg) of **FMe520** recovered. This indicates that  $\sim 0.68$  mg of **FMe520** (7.3%), were adsorbed to the external surface of the preformed ZIF-8.

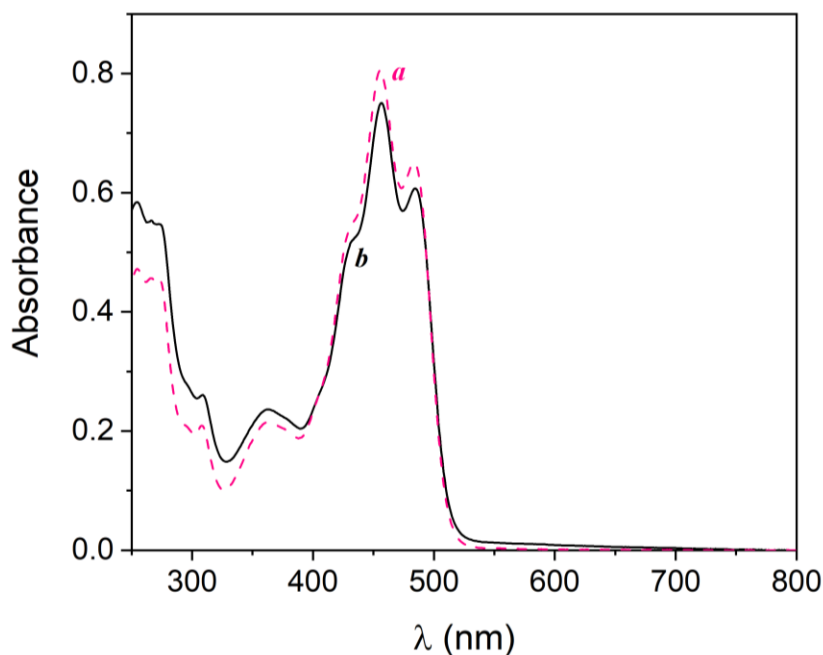

**Figure S4.** Absorption spectra (20°C, CH<sub>3</sub>OH) of the combined and rediluted supernatants obtained after mixing of **FMe520** with pre-formed ZIF-8 for 48 h.

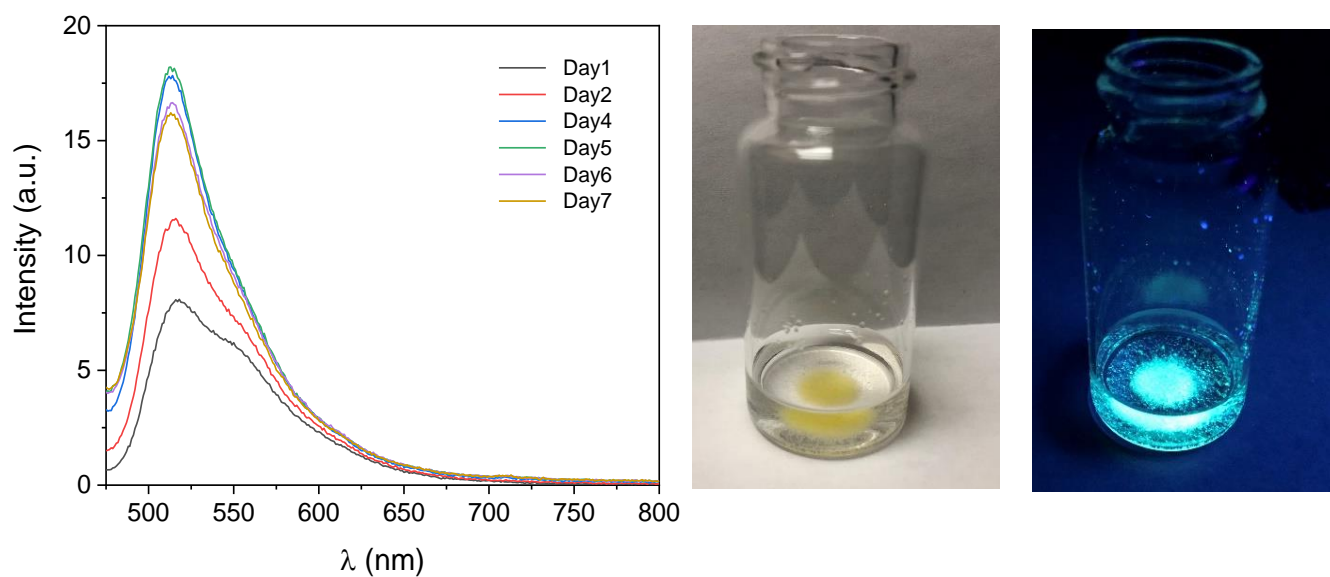

**Figure S5.** Emission spectra (20°C,  $\lambda_{\text{Ex}} = 450$  nm) of a dispersion of **FMe520@ZIF-8** in CH<sub>3</sub>OH stirred over a week. Photographs illustrate that **FMe520** encapsulated in ZIF-8 is not soluble in CH<sub>3</sub>OH unless released from the metal-organic framework (vide infra).

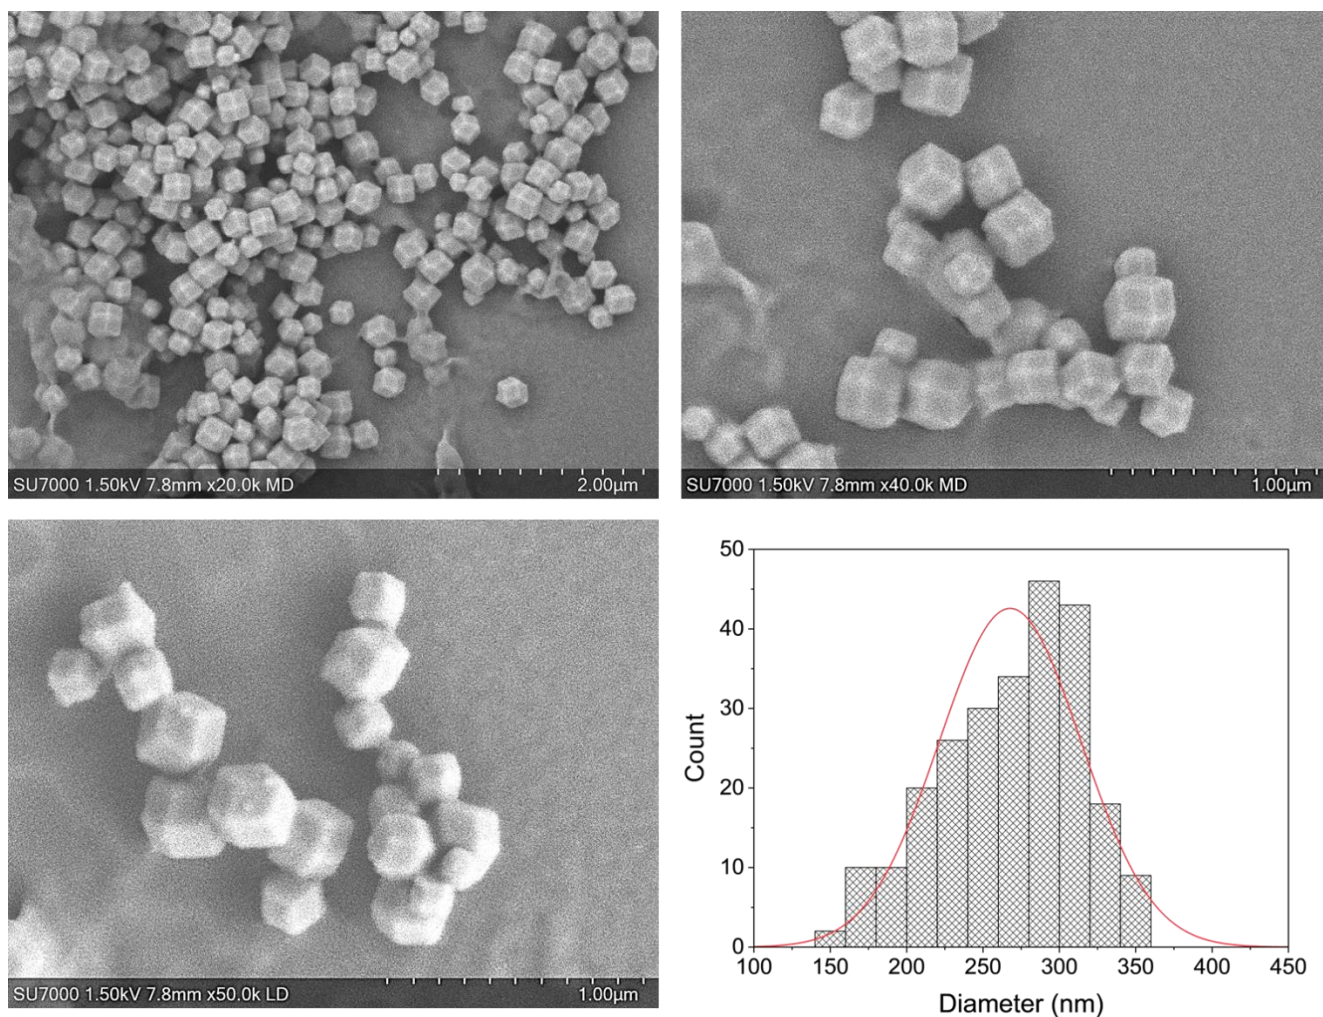

**Figure S6.** Scanning Electron Microscopy (SEM) of ZIF-8. Histogram showing Gaussian distribution of ZIF-8 particle diameters measured using Fiji (ImageJ).

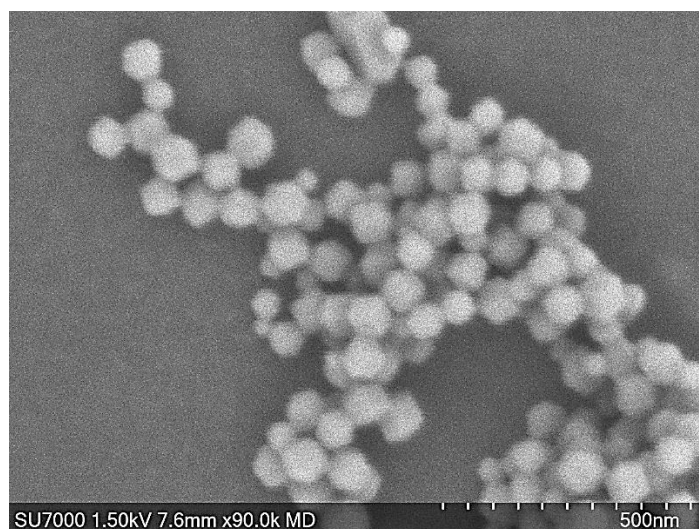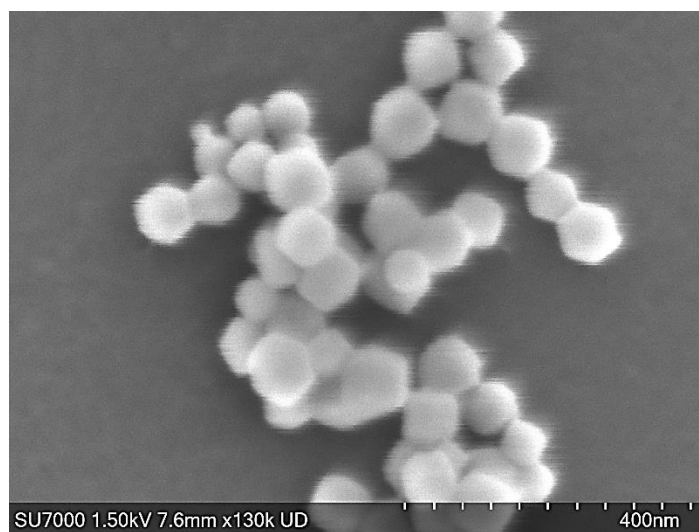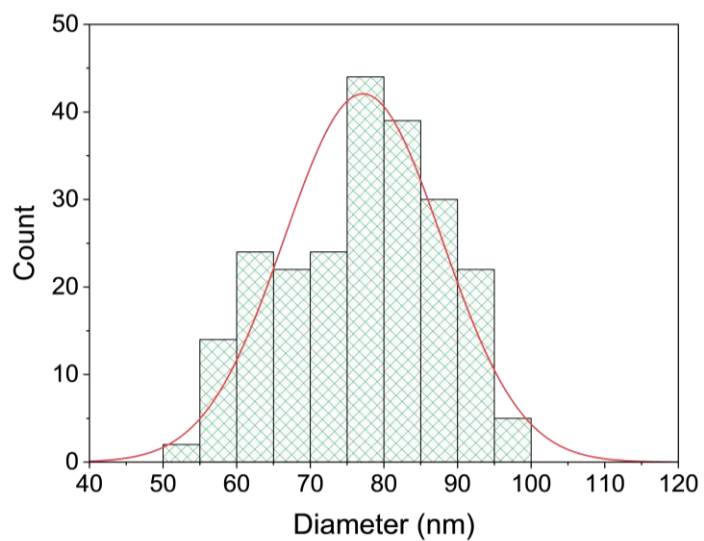

**Figure S7.** Scanning Electron Microscopy (SEM) of **FMe520@ZIF-8**. Histogram showing Gaussian distribution of ZIF-8 particle diameters measured using Fiji (ImageJ).



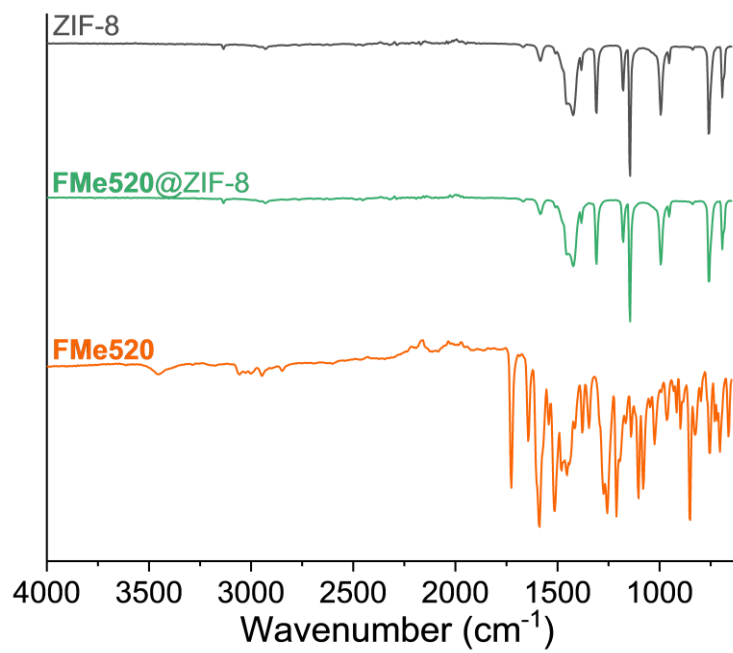

**Figure S8.** FTIR-ATR spectra of ZIF-8 (black trace), **FMe520@ZIF-8** (green trace) and **FMe520** (orange trace).

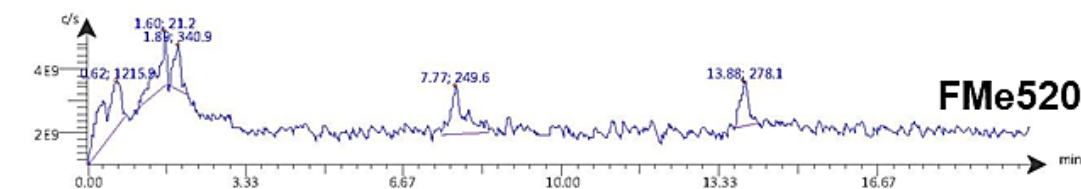

| Time (Peak Maximum M:S/Minutes) | Maximum Intensity (c/s) | Time (Peak Centroid M:S/Minutes) | Peak Area | % Peak Area | Peak Resolution | Base Peak Mass (m/z) | Label |
|---------------------------------|-------------------------|----------------------------------|-----------|-------------|-----------------|----------------------|-------|
| 0.62                            | 1.4E9                   | 0.60                             | 4.3E10    | 37.7        | 13.6            | 1215.9               |       |
| 1.60                            | 1.7E9                   | 1.62                             | 1.9E10    | 16.9        | 4.3             | 21.2                 |       |
| 1.89                            | 1.3E9                   | 1.89                             | 1.2E10    | 10.5        | 9.2             | 340.9                |       |
| 7.77                            | 1.4E9                   | 7.75                             | 2.5E10    | 22.1        | 9.0             | 249.6                |       |
| 13.88                           | 1.3E9                   | 13.86                            | 1.5E10    | 12.9        | 11.0            | 278.1                |       |

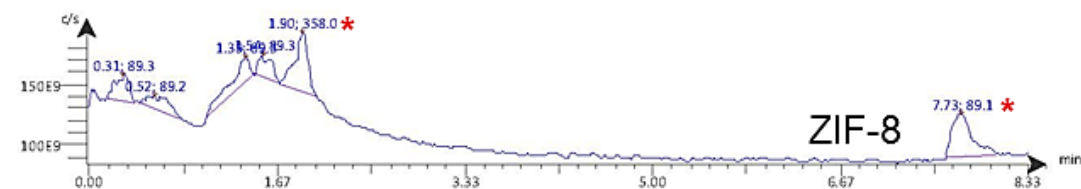

| Time (Peak Maximum M:S/Minutes) | Maximum Intensity (c/s) | Time (Peak Centroid M:S/Minutes) | Peak Area | % Peak Area | Peak Resolution | Base Peak Mass (m/z) | Label |
|---------------------------------|-------------------------|----------------------------------|-----------|-------------|-----------------|----------------------|-------|
| 0.31                            | 2.2E10                  | 0.29                             | 1.7E11    | 11.6        | 9.3             | 89.3                 |       |
| 0.52                            | 8.6E9                   | 0.57                             | 1.4E11    | 9.7         | 11.7            | 89.2                 |       |
| 1.39                            | 1.8E10                  | 1.38                             | 2.2E11    | 15.1        | 4.9             | 89.3                 |       |
| 1.54                            | 1.7E10                  | 1.55                             | 1.4E11    | 9.4         | 12.2            | 89.3                 |       |
| 1.90                            | 4.9E10                  | 1.89                             | 3.8E11    | 26.1        | 6.0             | 358.0                |       |
| 7.73                            | 3.4E10                  | 7.74                             | 4.1E11    | 28.1        | 10.5            | 89.1                 |       |

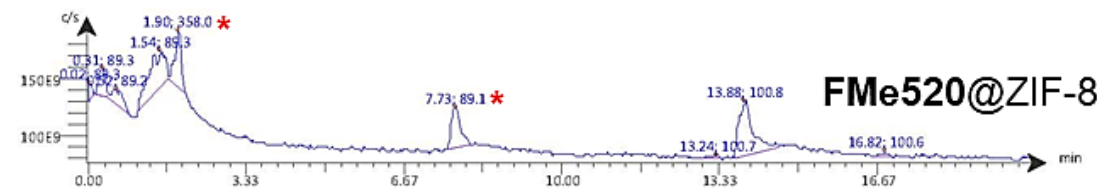

| Time (Peak Maximum M:S/Minutes) | Maximum Intensity (c/s) | Time (Peak Centroid M:S/Minutes) | Peak Area | % Peak Area | Peak Resolution | Base Peak Mass (m/z) | Label |
|---------------------------------|-------------------------|----------------------------------|-----------|-------------|-----------------|----------------------|-------|
| 0.02                            | 1.5E10                  | 0.03                             | 5E10      | 1.7         | 4.2             | 89.3                 |       |
| 0.31                            | 2.3E10                  | 0.29                             | 1.9E11    | 6.1         | 9.4             | 89.3                 |       |
| 0.52                            | 9.6E9                   | 0.57                             | 1.7E11    | 5.5         | 13.7            | 89.2                 |       |
| 1.54                            | 3.1E10                  | 1.50                             | 8E11      | 26.5        | 11.0            | 89.3                 |       |
| 1.90                            | 5E10                    | 1.89                             | 4E11      | 13.4        | 6.6             | 358.0                |       |
| 7.73                            | 3.5E10                  | 7.74                             | 4.4E11    | 14.6        | 10.6            | 89.1                 |       |
| 13.24                           | 2.9E9                   | 13.25                            | 2.8E10    | 0.9         | 5.9             | 100.7                |       |
| 13.88                           | 4.8E10                  | 13.85                            | 9.1E11    | 30.3        | 15.8            | 100.8                |       |
| 16.82                           | 3E9                     | 16.83                            | 2.9E10    | 0.9         | 6.7             | 100.6                |       |

Figure S9. Electrospray ionization mass spectrometry of FMe520, ZIF-8, and FMe520@ZIF-8.

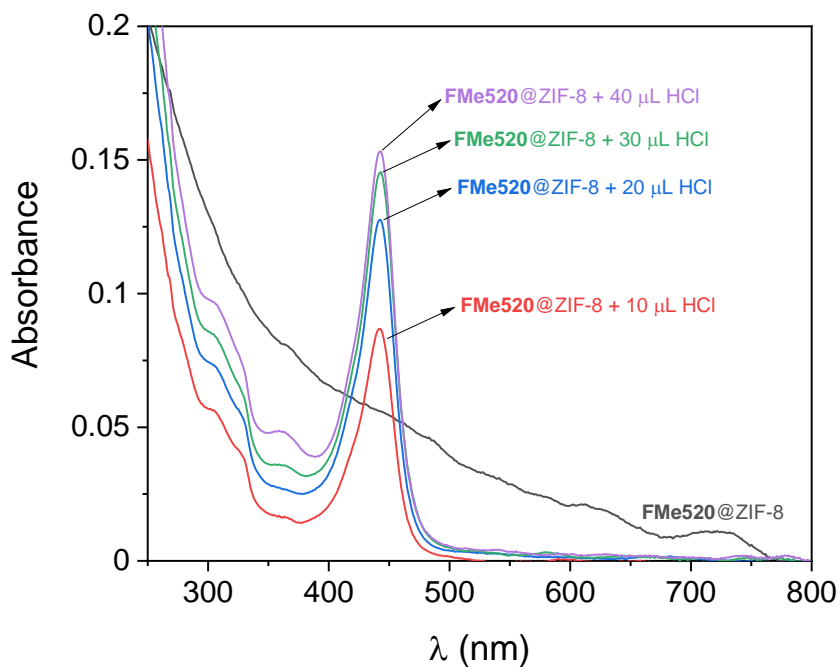

**Figure S10.** Absorption spectra of a dispersion of **FMe520@ZIF-8** before and after the addition of incremental amounts of HCl (12 M stock solution). Note that from the absorption values of **FMe520** in acidic environment extracted from Figure S11 below, we recalculated the dye encapsulation percentage to be  $\sim 24.8\%$ , in excellent agreement with our previous estimate (Fig. S3 and related discussion).

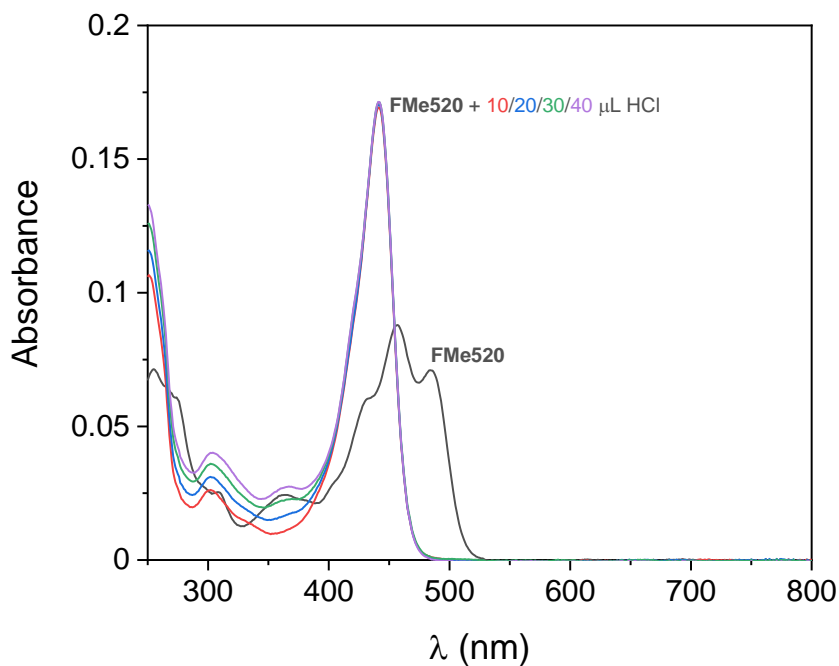

**Figure S11.** Absorption spectra of a solution of **FMe520** (3  $\mu$ M, 20°C, CH<sub>3</sub>OH) before and after the addition of incremental amounts of HCl (12 M stock solution).

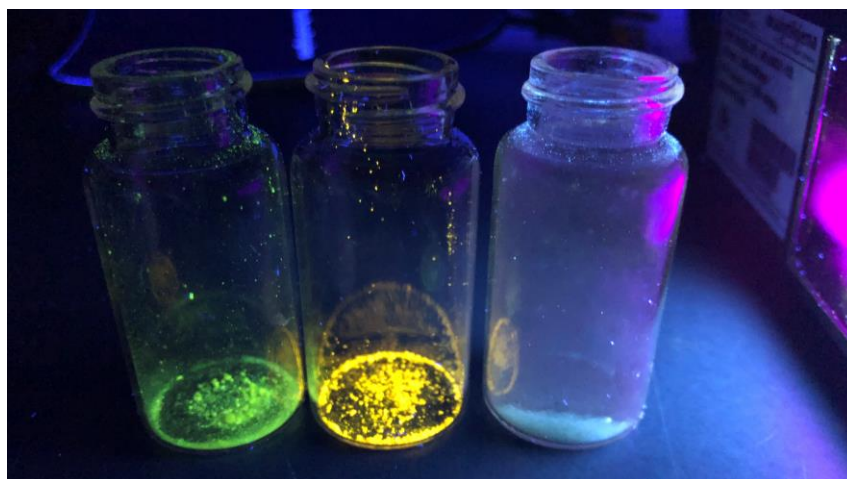

**Figure S12.** From left to right: Samples of **FMe520@ZIF-8**, **FMe520**, and **ZIF-8** viewed under ultraviolet light.

**Table S1.** Average fluorescence lifetimes of **FMe520** and **FMe520@ZIF-8** obtained from five different FLIM regions of interest (ROI, Fig S13 and S14). Note that the mean value and standard deviation from ROIs 1-5 are in good agreement with the data from ROI 6, which corresponds to the entire FLIM field of view and to Figure 5A in the main text.

| Descriptor                   | Lifetime (ns) of FMe520           | Lifetime (ns) of FMe520@ZIF-8     |
|------------------------------|-----------------------------------|-----------------------------------|
| ROI 1                        | $3.20 \pm 0.09$                   | $6.23 \pm 1.1$                    |
| ROI 2                        | $3.29 \pm 0.09$                   | $6.68 \pm 0.75$                   |
| ROI 3                        | $3.18 \pm 0.09$                   | $6.42 \pm 1.1$                    |
| ROI 4                        | $3.25 \pm 0.09$                   | $6.61 \pm 0.98$                   |
| ROI 5                        | $3.18 \pm 0.09$                   | $6.44 \pm 0.80$                   |
| Mean (ROIs 1-5)              | <b><math>3.22 \pm 0.09</math></b> | <b><math>6.48 \pm 0.95</math></b> |
| ROI 6 (Entire Field of View) | <b><math>3.22 \pm 0.10</math></b> | <b><math>6.49 \pm 0.96</math></b> |

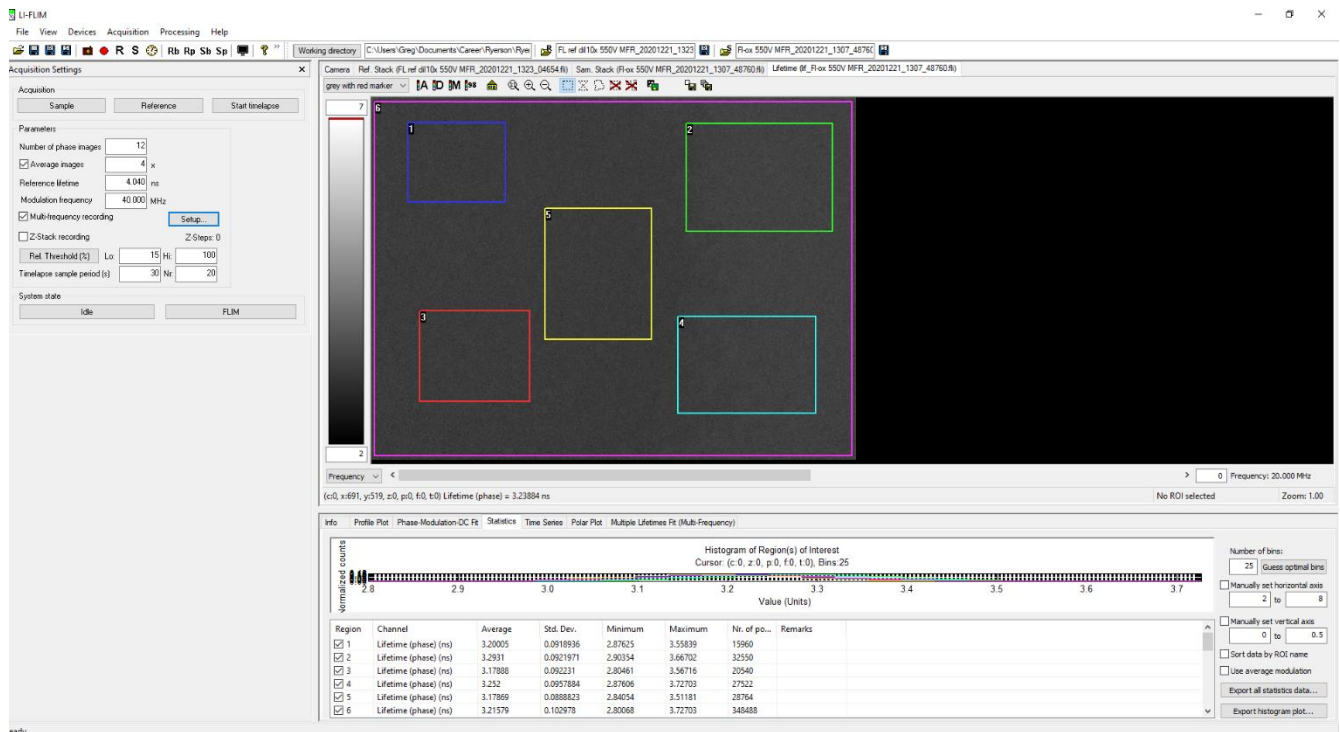

Figure S13. Raw FLIM data for FMe520 showing ROIs 1-6.

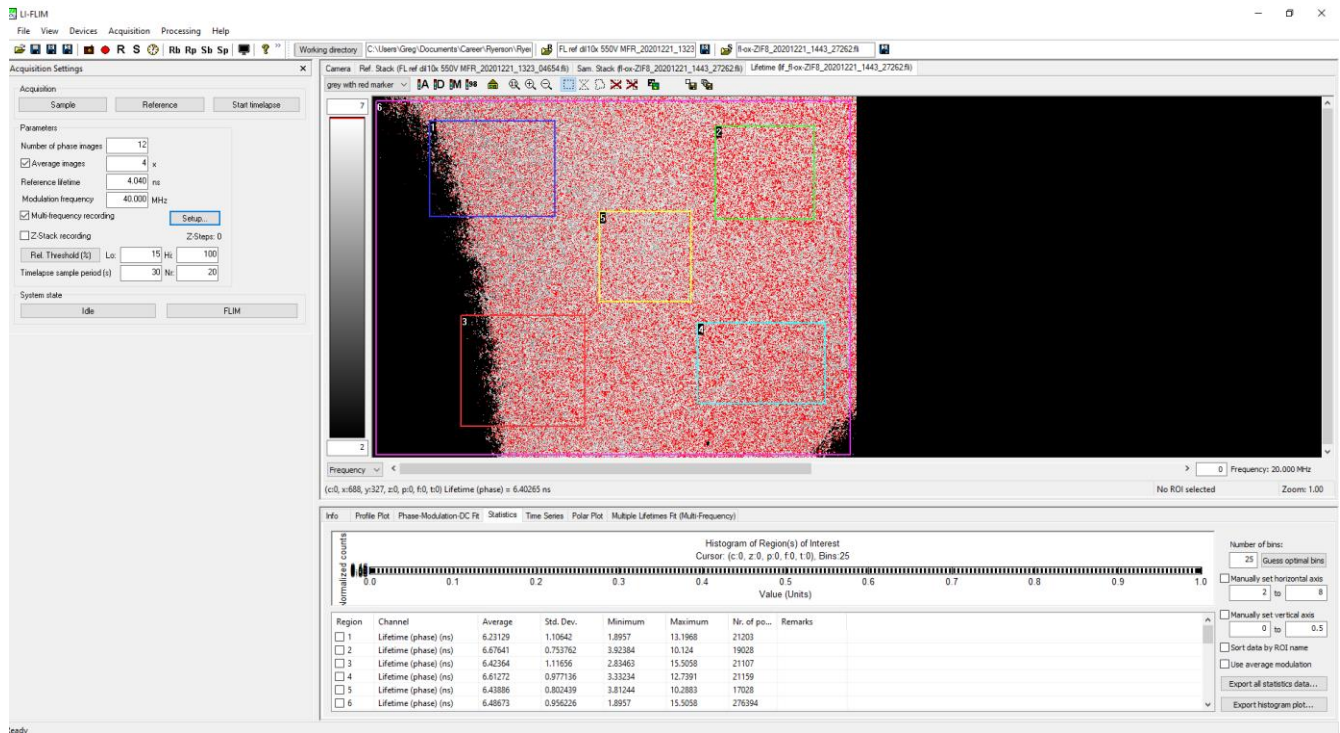

Figure S14. Raw FLIM data for FMe520@ZIF-8 showing ROIs 1-6.

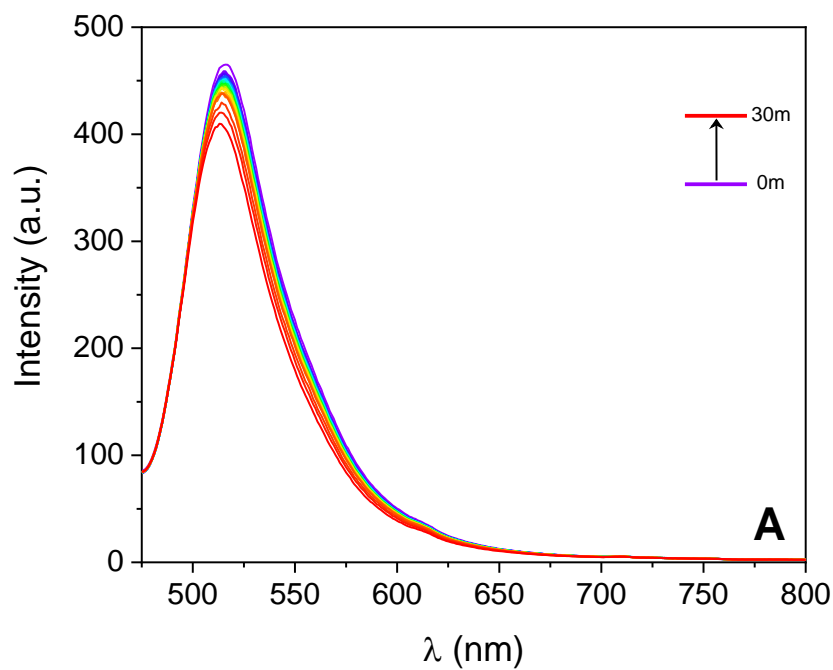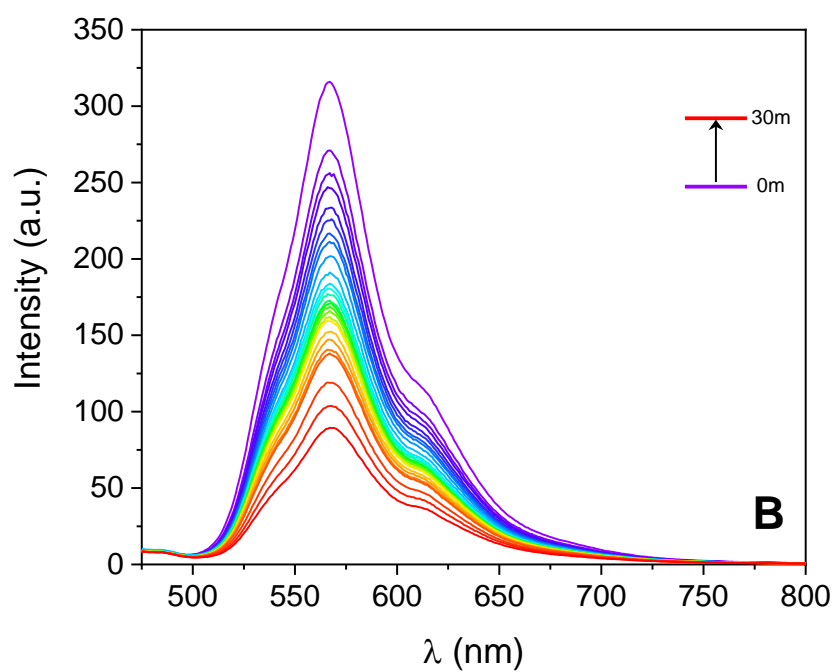

**Figure S15.** Photobleaching test: emission spectra recorded at the solid state of (A) FMe520@ZIF-8 and (B) FMe520 before and after irradiation at 455 nm (0 – 30 min).

**Table S2.** Zn-N bond distances in ZIF-8.

| Experimental /Å | Calculated <sup>a</sup> /Å |
|-----------------|----------------------------|
| 1.965           | 1.931                      |
|                 | 1.943                      |
|                 | 1.948                      |

<sup>a</sup>SCC-DFTB

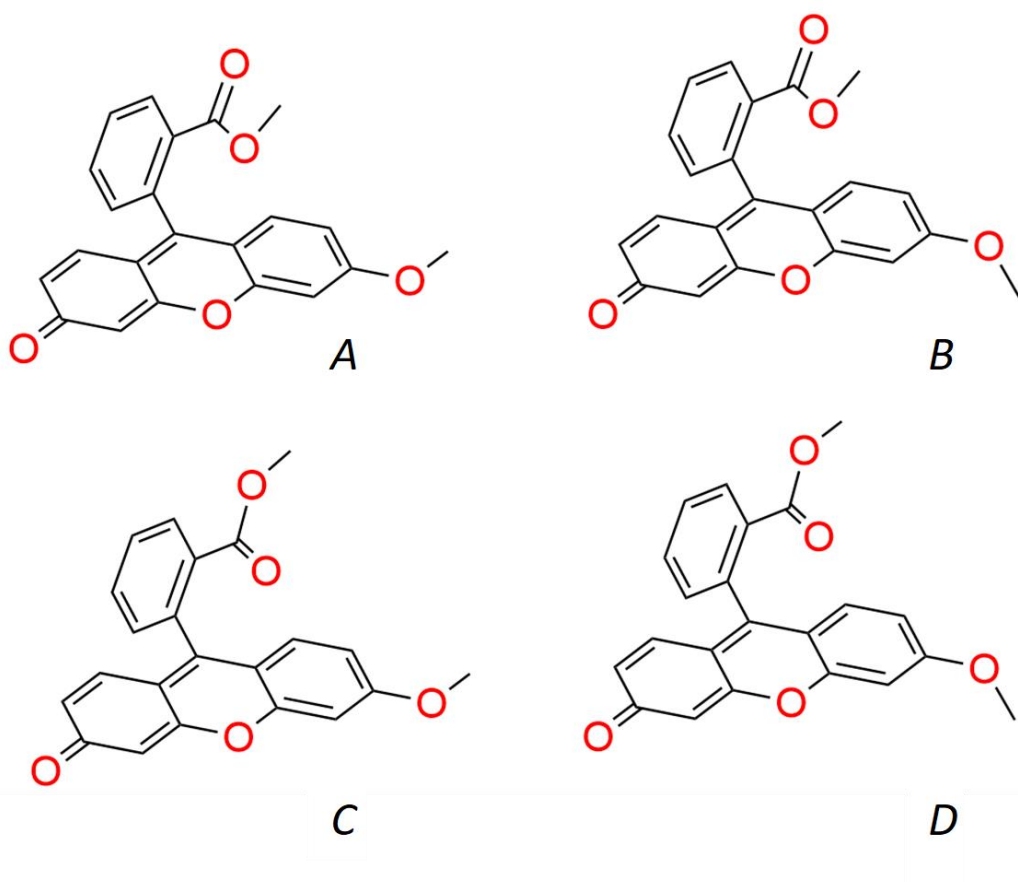

**Figure S16.** Four conformers of FMe520.

**Table S3.** Boltzmann-averaged fractional abundances of **FeMe520** conformers.

| Conformer | Gibbs energy (DFTB)<br>/ Hartree | Fraction at<br>300 K | Gibbs energy (B3LYP/6-<br>311+G(d,p)) / Hartree | Fraction at<br>300 K |
|-----------|----------------------------------|----------------------|-------------------------------------------------|----------------------|
| <i>A</i>  | -60.206411                       | 0.073                | -1224.133037                                    | 0.115                |
| <i>B</i>  | -60.207221                       | 0.170                | -1224.134046                                    | 0.335                |
| <i>C</i>  | -60.207471                       | 0.221                | -1224.133231                                    | 0.142                |
| <i>D</i>  | -60.208312                       | 0.536                | -1224.134234                                    | 0.408                |



**Table S4.** Energy differences (SCC-DFTB) between optimized **FMeF520** conformer-cage complexes and the sums of the separated components.<sup>a</sup>

| FMeF520 conformer in SOD cage | Energy (DFTB) / Hartrees | $\Delta E$ / Hartrees |
|-------------------------------|--------------------------|-----------------------|
| cage only                     | -585.677522              | -                     |
| <i>A</i> only                 | -60.477020               | -                     |
| <i>B</i> only                 | -60.477610               | -                     |
| <i>C</i> only                 | -60.477654               | -                     |
| <i>D</i> only                 | -60.478526               | -                     |
| <i>A</i>                      | -646.159086              | -0.004544             |
| <i>A</i>                      | -646.143221              | 0.011321              |
| <i>B</i>                      | -646.157430              | -0.002298             |
| <i>B</i>                      | -646.151898              | 0.003234              |
| <i>B</i>                      | -646.150777              | 0.004355              |
| <i>B</i>                      | -646.152560              | 0.002572              |
| <i>B</i>                      | -646.150143              | 0.004989              |
| <i>C</i>                      | -646.160210              | -0.005034             |
| <i>C</i>                      | -646.150725              | 0.004451              |
| <i>C</i>                      | -646.143791              | 0.011385              |
| <i>D</i>                      | -646.157110              | -0.001062             |
| <i>D</i>                      | -646.154306              | 0.001742              |

<sup>a</sup>ZIF-8 SOD cage omitting coordinatively unsaturated imidazolate ligands with frozen coordinates.

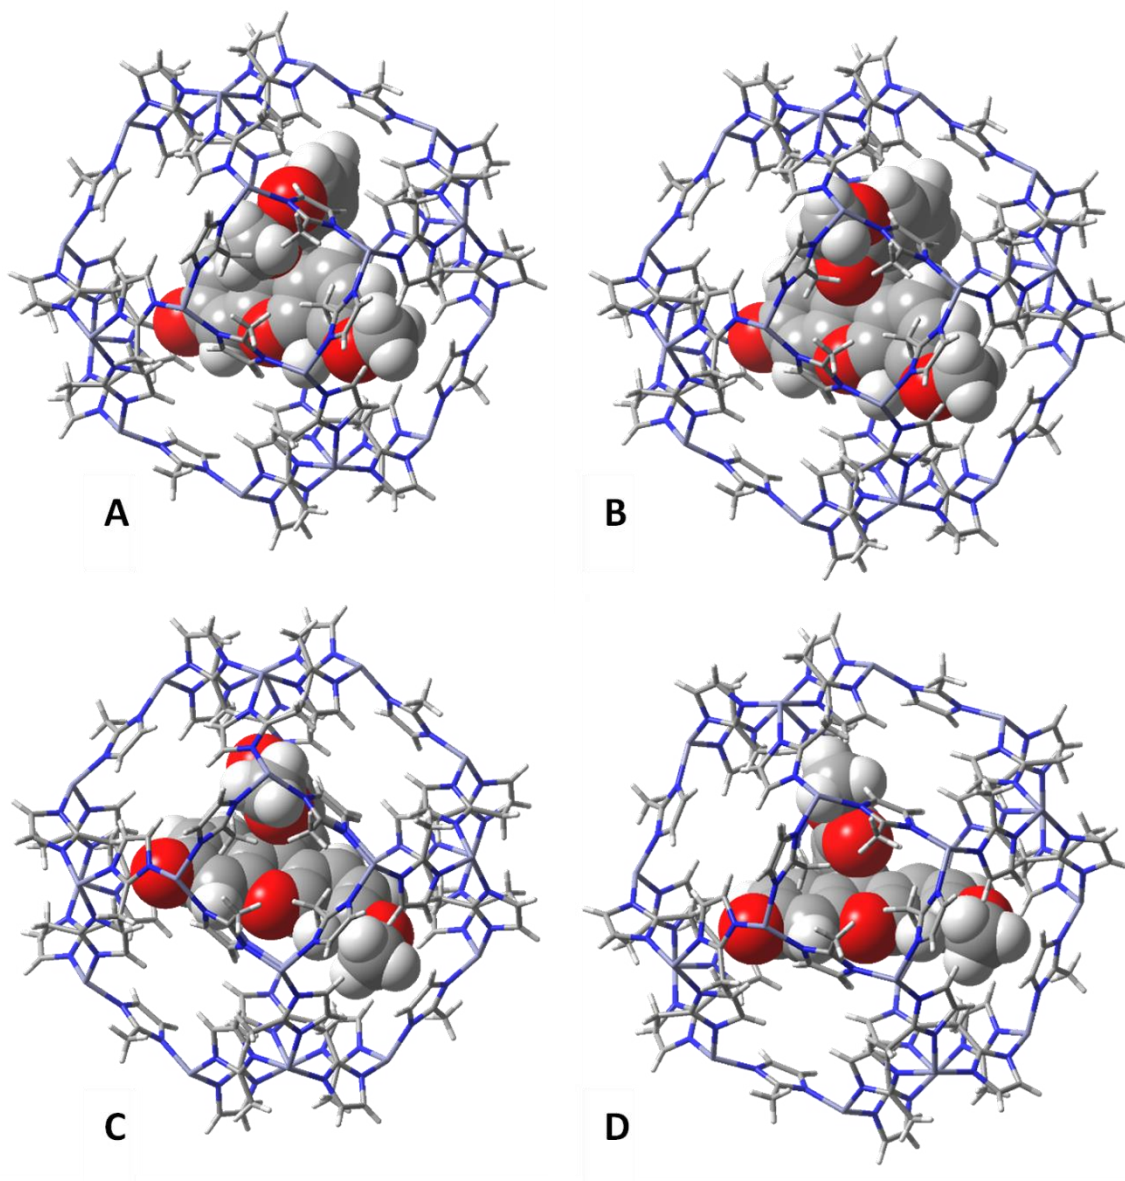

**Figure S17.** Four examples of stabilized ZIF-8 cage complexes of **FMe520**. **A**: conformer *A*,  $\Delta E = -12$  kJ mol<sup>-1</sup>; **B**: conformer *B*,  $\Delta E = -6$  kJ mol<sup>-1</sup>; **C**: conformer *C*,  $\Delta E = -13$  kJ mol<sup>-1</sup>; **D**: conformer *D*,  $\Delta E = -3$  kJ mol<sup>-1</sup>.
